# Supplementary material
Source: PubMed Central journal article supplement (PMC9438418)
Supplement: KID.0000362022-s0002.pdf [file KID.0000362022-s0002.pdf]

## Supplementary Materials

Wu and Wolley *et al.*, Acute intravenous NaCl and volume expansion reduces sodium-chloride-cotransporter abundance and phosphorylation in urinary extracellular vesicles

### Table of Contents

**Supplementary Spreadsheet.** The LC-MS/MS proteomics data.

**Supplementary Methods.** Detailed methods in the current study.

**Figure S1.** Flow diagram of report numbers of individuals at each stage of study.

**Figure S2.** A heatmap clustering of 294 differentially expressed proteins during SSST between PA and LRH subjects.

**Figure S3.** Functional enrichment analyses of the 878 DEPs.

**Figure S4.** Correlations between biochemical parameters and the 12 differentially expressed renal transmembrane proteins.

**Figure S5.** Immunoblots of analysed proteins.

**Figure S6.** Correlations between biochemical parameters and NCC, pNCC and AQP2.

**Figure S7.** Boxplots of changes in the total contents in the urine during SSST.

**Figure S8.** Correlations between EV markers (quantified by immunoblotting and MS) and spot urine creatinine.

**Table S1.** Participants' clinical features and anti-hypertensive drugs at baseline.

**Table S2.** NTA measures of particle size and concentration of nine uEV samples.

**Table S3.** Abbreviation list.

## Supplementary Methods

- Recruitment

Hypertensive patients who were admitted for SSST in the Hypertension Unit of Princess Alexandra Hospital were invited to participate and provide informed written consent. A total of 44 (F29/M15) patients were invited and all agreed to participate. All subjects were hypertensive with repeatedly raised ARR and underwent SSST to confirm or exclude the diagnosis of PA.

- Sample size

We previously reported several uEV proteins increased over 2.5-fold in responding to alterations of mineralocorticoid and salt loading, and plasma aldosterone to be suppressed on at least of 101 pmol/L in 24 patients with PA subjects. For proteins that are detectable by MS and WB, we accepted a  $p < 0.05$  with 80% power using two-tailed test for bidirectional result. Due to the co-isolation and fragmentation of the isobaric precursor ions, a TMT multiplex labelling strategy reduces missing data points, providing high-quality data for statistical analysis from a limited number of clinical samples (generally one peptide with  $\leq 5$  replicates per condition) [20, 21]. Assuming SSST would induce at least a 50%-fold change, we required at least 10 subjects analysed on MS and 16 subjects analysed on WB.

- The SSST

At least four weeks prior to SSST, medications affecting plasma aldosterone and renin levels were withdrawn and replaced by other anti-hypertensive medications (e.g., verapamil, prazosin or doxazosin, moxonidine and/or hydralazine). Patients undergoing

SSST were admitted to hospital to ensure the dietary (normal hospital diet) and posture requirements were met and to facilitate monitoring of plasma  $K^+$  levels and other parameters. An infusion of 2 L of 0.9% saline over 4 hours was commenced at 8AM, 30 min after assuming a seated position. Two aliquots of bloods were collected just before 8AM (baseline) and at completion of the infusion at 12 noon (post-SSST). Clinical routine measurements of plasma aldosterone (by LC-MS/MS), direct renin concentration (by chemiluminescent immunoassay), cortisol (by immunoassay) and  $K^+$  levels were performed by Pathology Queensland Laboratory right after the SSST. Due to limited amounts of bloods, plasma concentrations of  $Cl^-$  and  $HCO_3^-$  were analysed by Pathology Queensland Laboratory in 41 participants, including 31 (F18/M13) PA and 10 (F10/M0) LRH subjects, plasma copeptin was measured in 33 participants (PA25, F14/M11; LRH8, F8/M0). Blood pressure was recorded during SSST. Demonstration of aldosterone production that is relatively autonomous of its chronic regulator angiotensin II requires failure of plasma aldosterone to suppress to below 162 pmol/L, provided that direct renin concentration at completion was less than 8.4 mU/L and plasma cortisol concentration was lower at completion than that basally.

- Urine collection and isolation of uEVs

Participants were provided with two sterilised 200ml containers for urine collection. 50-200 ml of mid-stream second morning urine were collected before SSST at 7AM (basal) and 1 hour post completion (post) of the saline infusion. Collected urine samples were immediately treated with protease inhibitor cocktail (Roche cOmplete, EDTA-free) and phosphatase inhibitors (Sigma-Aldrich, Pierce™) before aliquoting and freezing at  $-80^\circ C$ . Nine participants provided an additional urine collection at 8AM on the day before SSST

to be used as a baseline sample, as participants felt they would be unable to produce enough urine volume on the day of SSST. Due to limited spot urine samples, spot urine creatinine concentration was measured in 39 participants (PA32, F18/M14; LRH7, F7/M0) using a creatinine urinary detection assay kit (EIACUN, Invitrogen). uEVs were isolated using progressive ultracentrifugation techniques with 200 mg/mL dithiothreitol treatment. For LC-MS/MS the obtained uEVs were resuspended in 200  $\mu$ l uEV isolation buffer containing 1x phosphate-buffered saline (PBS), protease and phosphatase inhibitors and 0.5% SDS. For immunoblotting analysis, uEVs were resuspended in approximately 110  $\mu$ l of 1x PBS containing 0.5% SDS. Resuspended uEVs were ultrasonic-homogenised for 5 cycles of 10 seconds on/off on ice before being frozen at  $-80^{\circ}\text{C}$  pending subsequent analyses.

- Characterisation of uEVs

uEVs were characterized by size distribution measured by nanoparticle-tracking analysis (NTA) and the presence of marker proteins of EV (e.g., ALIX, TSG101). Due to the limited amount of uEVs obtained from participants, nine uEVs isolated from two healthy volunteers at different times on multiple days were characterised by both NTA and the presence of marker proteins using immunoblotting, and patients' uEVs were characterised by the presence of marker proteins by LC-MS/MS and immunoblotting. For NTA, a NanoSight NS500 instrument (Nanosight Ltd, Amesbury, UK) with NanoSight NTA v3 software was used. Before each session, the acquisition parameter settings were determined using the NTA latex standard (Malvern Polystyrene Latex Microsphere 100nm) in a 1/250 dilution in ultrapure water (Pureau, AU), and fixed for all measurements during the session [camera level 10, slider shutter 696, slider gain 73, detection threshold 5]. All uEV samples were analysed on 5 captures of 60 seconds. Sample dilution was initiated at 1/500, while

alternative dilutions were applied to obtain the recommended number of particles (50-100) per image.

- TMT labelled LC-MS/MS

- Sample preparation and digestion

Peptides for LC-MS/MS were generated using filter-aided sample preparation. In short, uEV samples were centrifuged at  $16000\times g$  for 1 h at  $4^{\circ}\text{C}$  and supernatants assayed for protein concentration using the Pierce BCA Protein Assay Kit (Thermo Scientific, IL, USA).  $10\ \mu\text{g}$  of individual exosome proteins were loaded onto a Vivacon-30 kDa spin column (Sartorius, Goettingen, Germany) by centrifugation at  $16000\times g$ . Spin columns were washed three times with UA buffer containing 8 M urea (ThermoFisher, IL, USA) and 100 mM triethylammonium bicarbonate (Fisher Scientific, Leicestershire, UK). The proteins were then reduced using 50 mM of dithiothreitol (ThermoFisher, IL, USA) for 1 h at  $56^{\circ}\text{C}$  and alkylated with 50 mM 2-chloroacetamide for 20 minutes in the dark at room temperature, with centrifugation after each addition to remove excessive reagents. The spin columns were then washed one more time with UA buffer before adding  $40\ \mu\text{l}$  of Lys-C solution (FUJIFILM Wako, Osaka, Japan) (enzyme: protein = 1:50, dissolved in UA buffer). After 3h incubation at  $37^{\circ}\text{C}$ ,  $400\ \mu\text{l}$  of trypsin solution (Promega, WI, USA) (enzyme: protein = 1:25, dissolved in 100 mM triethylammonium bicarbonate) was added, and the spin column was incubated at  $37^{\circ}\text{C}$  overnight. Peptides were collected by centrifuging the spin column in a new collection tube. Peptide concentration was measured using the Pierce Fluorometric Peptide Assay Kit (ThermoFisher, IL, USA) according to the manufacturer's protocol.

- TMT labelling and fractionation

Peptides were labelled with TMT 10plex isobaric labeling reagents (ThermoFisher, IL, USA). In brief, 0.4mg of each TMT tag (127N, 127C, 128N, 128C, 129N, 129C, 130N and 130C) was dissolved in 164µl acetonitrile, before adding to 400µl of peptide solution containing 6.4 µg peptides (Supplemental Table 2). A universal control channel containing an equal peptide amount from each sample was used and labelled with TMT tag 126 for comparisons between samples. After one hour at room temperature, individual labelling reactions were quenched by addition of 32 µl of 5% hydroxylamine. Individually labelled samples were combined and vacuum-dried in a SpeedVac, before fractionation using a Pierce high pH RP-fractionation kit (ThermoFisher, IL, USA) according to the manufacturer's protocol. In total three sets of TMT labelling were performed. Nine labelling channels were used in each set, with four patients (basal and post) occupying eight channels and one channel for the universal control.

- LC-MS/MS analysis

The TMT labelled samples were analyzed by nano liquid chromatography (nLC, EASY LC-1200, Thermo Fisher) coupled to a MS/MS system (Q Exactive Plus, Thermo Scientific) through an EASY-Spray nano-electrospray ion source (Thermo Scientific). A pre-column (Acclaim®PepMap 100, 75 µm x 2 cm, C18, 3 µm, 100 Å, Thermo Scientific) was used to trap peptides and an analytical column (EASY-Spray Column, PepMap, 75 µm x 25 cm, C18, 3 µm, 100 Å, Thermo Scientific) was used to separate peptides. For nLC separation, buffer A was 100% H<sub>2</sub>O/0.1% formic acid and buffer B was 80% ACN/0.1% formic acid. A linear gradient from 5% to 22% buffer B for 40 min, and then from 22% to 35% for 20 min was used for peptide separation. Precursor scans were performed at scan range of 300-1,600, a resolution of 70,000, maximum injection time of 100 ms and automatic gain

control of  $3 \times 10^6$ . MS/MS scans were up to 10 data-dependent acquisition scans performed at a resolution of 35,000, maximum injection time of 100 ms and automatic gain control of  $1 \times 10^5$ . Isolation window was set at 2 Da. Higher-energy-collisional-dissociation normalized collision energy was set at 33%. Fixed first mass was set at 110. Dynamic exclusion was set at 30 s. Rejection of precursor ions with charge state +1 and above +8 was employed.

- LC-MS/MS data analysis

LC-MS/MS raw files belonging to one TMT set were searched together against a UniProt human protein database (downloaded on 25<sup>th</sup> January 2019) using both the Sequest and Mascot algorithms through Proteome Discoverer software (v2.3). Quantification of peptides and proteins was done through the reporter ion quantification module of Proteome Discoverer, with corrections for TMT isotopic interferences enabled. Basal cursor mass tolerance was set as 10 ppm and fragment mass tolerance was set as 0.02 Da, and a maximum of 2 missed cleavage sites. Carbamidomethylation of cysteine was set as a static modification. Protein N-terminal acetylation, methionine oxidation, TMT labelling of peptide N-terminus and lysine were set as variable modifications. Peptide false discovery rate was calculated by Percolator and confined to  $\leq 1\%$ . Protein ratios obtained with the aid of the universal control channel TMT126 were log-transformed for paired *t*-test to determine the proteins that showed significant changes ( $p < 0.05$  with 95% confidence interval) post SSST. Differentially expressed protein (DEP) was identified as that with  $p < 0.05$ , FDR  $< 0.1$  and fold change of  $\geq 1.20$  or  $\leq 0.83$ .

- Immunoblotting validation

Defrosted uEVs were mixed thoroughly before 10 min centrifugation at  $15000\times g$  at  $4^{\circ}\text{C}$  to pellet insoluble residues. The supernatant was collected and total protein concentration was measured using a spectrophotometer (Thermo Scientific Nanodrop Lite). A uEV standard pool containing resuspension of mixed uEVs isolated from a large amount of urine collected from healthy normotensive volunteers between 9-11AM on multiple days was used as a universal control for normalisation of performance errors across all blots. uEVs were treated with 5x Laemmli sample buffer (1:4, v:v) and incubated at  $60^{\circ}\text{C}$  for 10 min before sodium dodecyl sulphate-polyacrylamide gel electrophoresis (SDS-PAGE). Twenty  $\mu\text{g}$  of each sample were loaded and separated on 8% poly-acrylamide mini gels, and were transferred to polyvinyl difluoride membranes (Bio-Rad) under 1.3A and 21V for 26 mins on a Bio-rad Turbo transferring system. Each blot was duplicated for proteins with similar size. Blots were then blocked with 5% BSA (A3858, Sigma) in Tris-Buffered saline (TBS), followed by overnight incubation with primary antibodies including: anti-AQP2 (1/1000; SPC-503, StressMarq Biosciences), anti-NCC (1/1000; AB3553, Merck Millipore), anti-pNCC (pT53/pT58; 1/1000), anti-ALIX (1/2000; ABC40, Merck Millipore), and anti-TSG101 (1/2000; MASBC649, Merck Millipore). AQP2 was measured by bands detected at 35-50 kDa (glycosylated) and at 29 kDa (unglycosylated protein); NCC and pNCC were measured by the dominant band around 150 kDa despite the observation of dimerisation; uEV markers ALIX and TSG101 were measured by the dominant bands at 96 kDa and 45 kDa respectively. HRP conjugated goat anti-rabbit IgG antibody (12-348, Merck Millipore) was used as the secondary antibody at 1/20,000 for luminol-based enhanced chemiluminescence (1705061, Bio-rad), respectively before image capture using a Bio-



Rad ChemiDoc XRS+ Imager on configure signal accumulation mode with Image Lab software.

- Bioinformatic analyses

Calculations were processed with R. Overlap analyses were performed using Vesiclepedia and ExoCarta protein databases to compare the MS dataset with other human urine studies and to identify EV-enriched proteins. A rat renal transporter protein database ([https://hpcwebapps.cit.nih.gov/ESBL/Database/NephronRNAseq/Transporters\\_and\\_Channels.html](https://hpcwebapps.cit.nih.gov/ESBL/Database/NephronRNAseq/Transporters_and_Channels.html)) was used to identify renal transmembrane proteins. Gene ontology analysis was performed by ClueGO plugin (v2.5.5) in the Cytoscape environment (v3.7.2), and gene lists corresponding to 878 DEPs were used as input. GO terms were updated on 11<sup>th</sup> June 2020. Evidence level was set at “All without IEA (Inferred from Electronic Annotation)”. GO term fusion was enabled, and only pathways with  $p \leq 0.01$  are shown. All other parameters were left at default.

**Figure S1.** Flow diagram of report numbers of individuals at each stage of study.

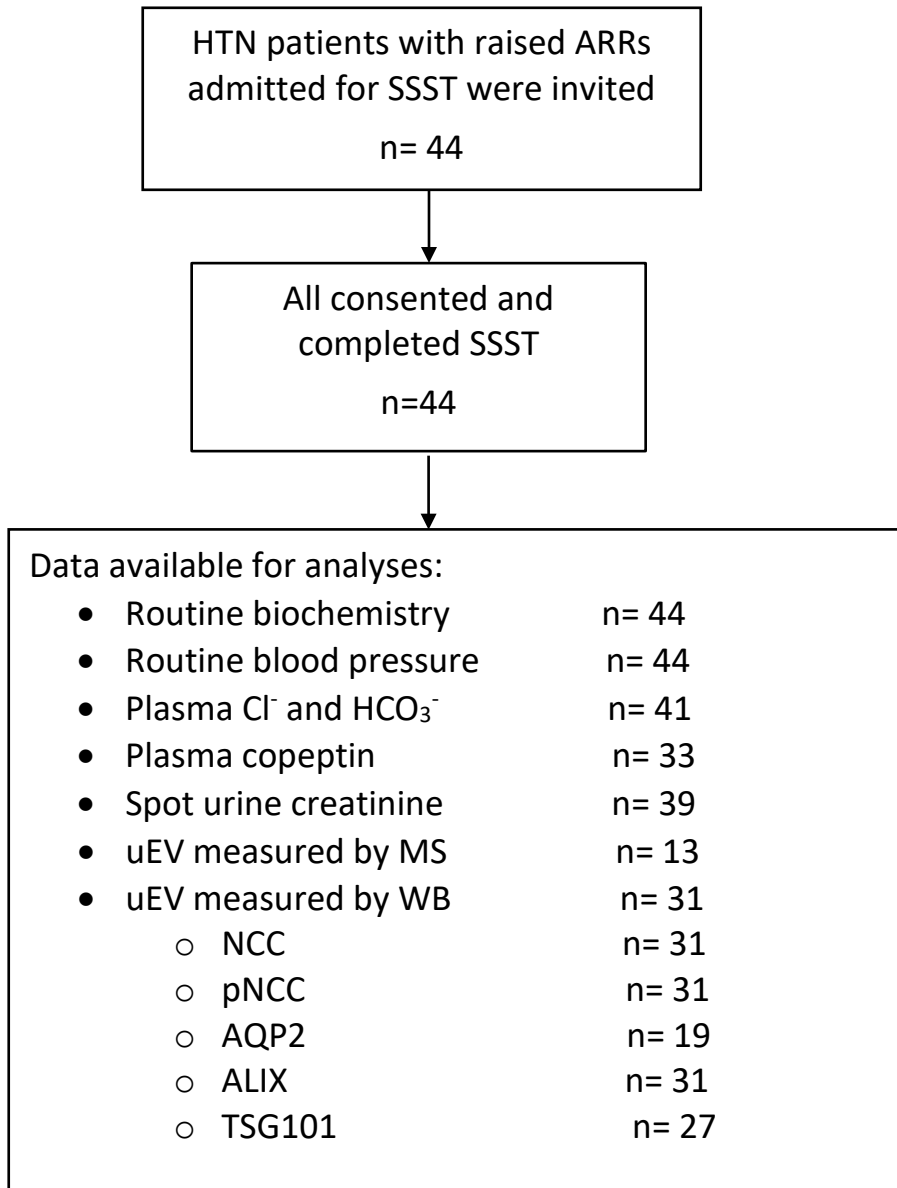

**Figure S2.** A heat map clustering of 294 differentially expressed proteins during SSST between PA and LRH subjects.

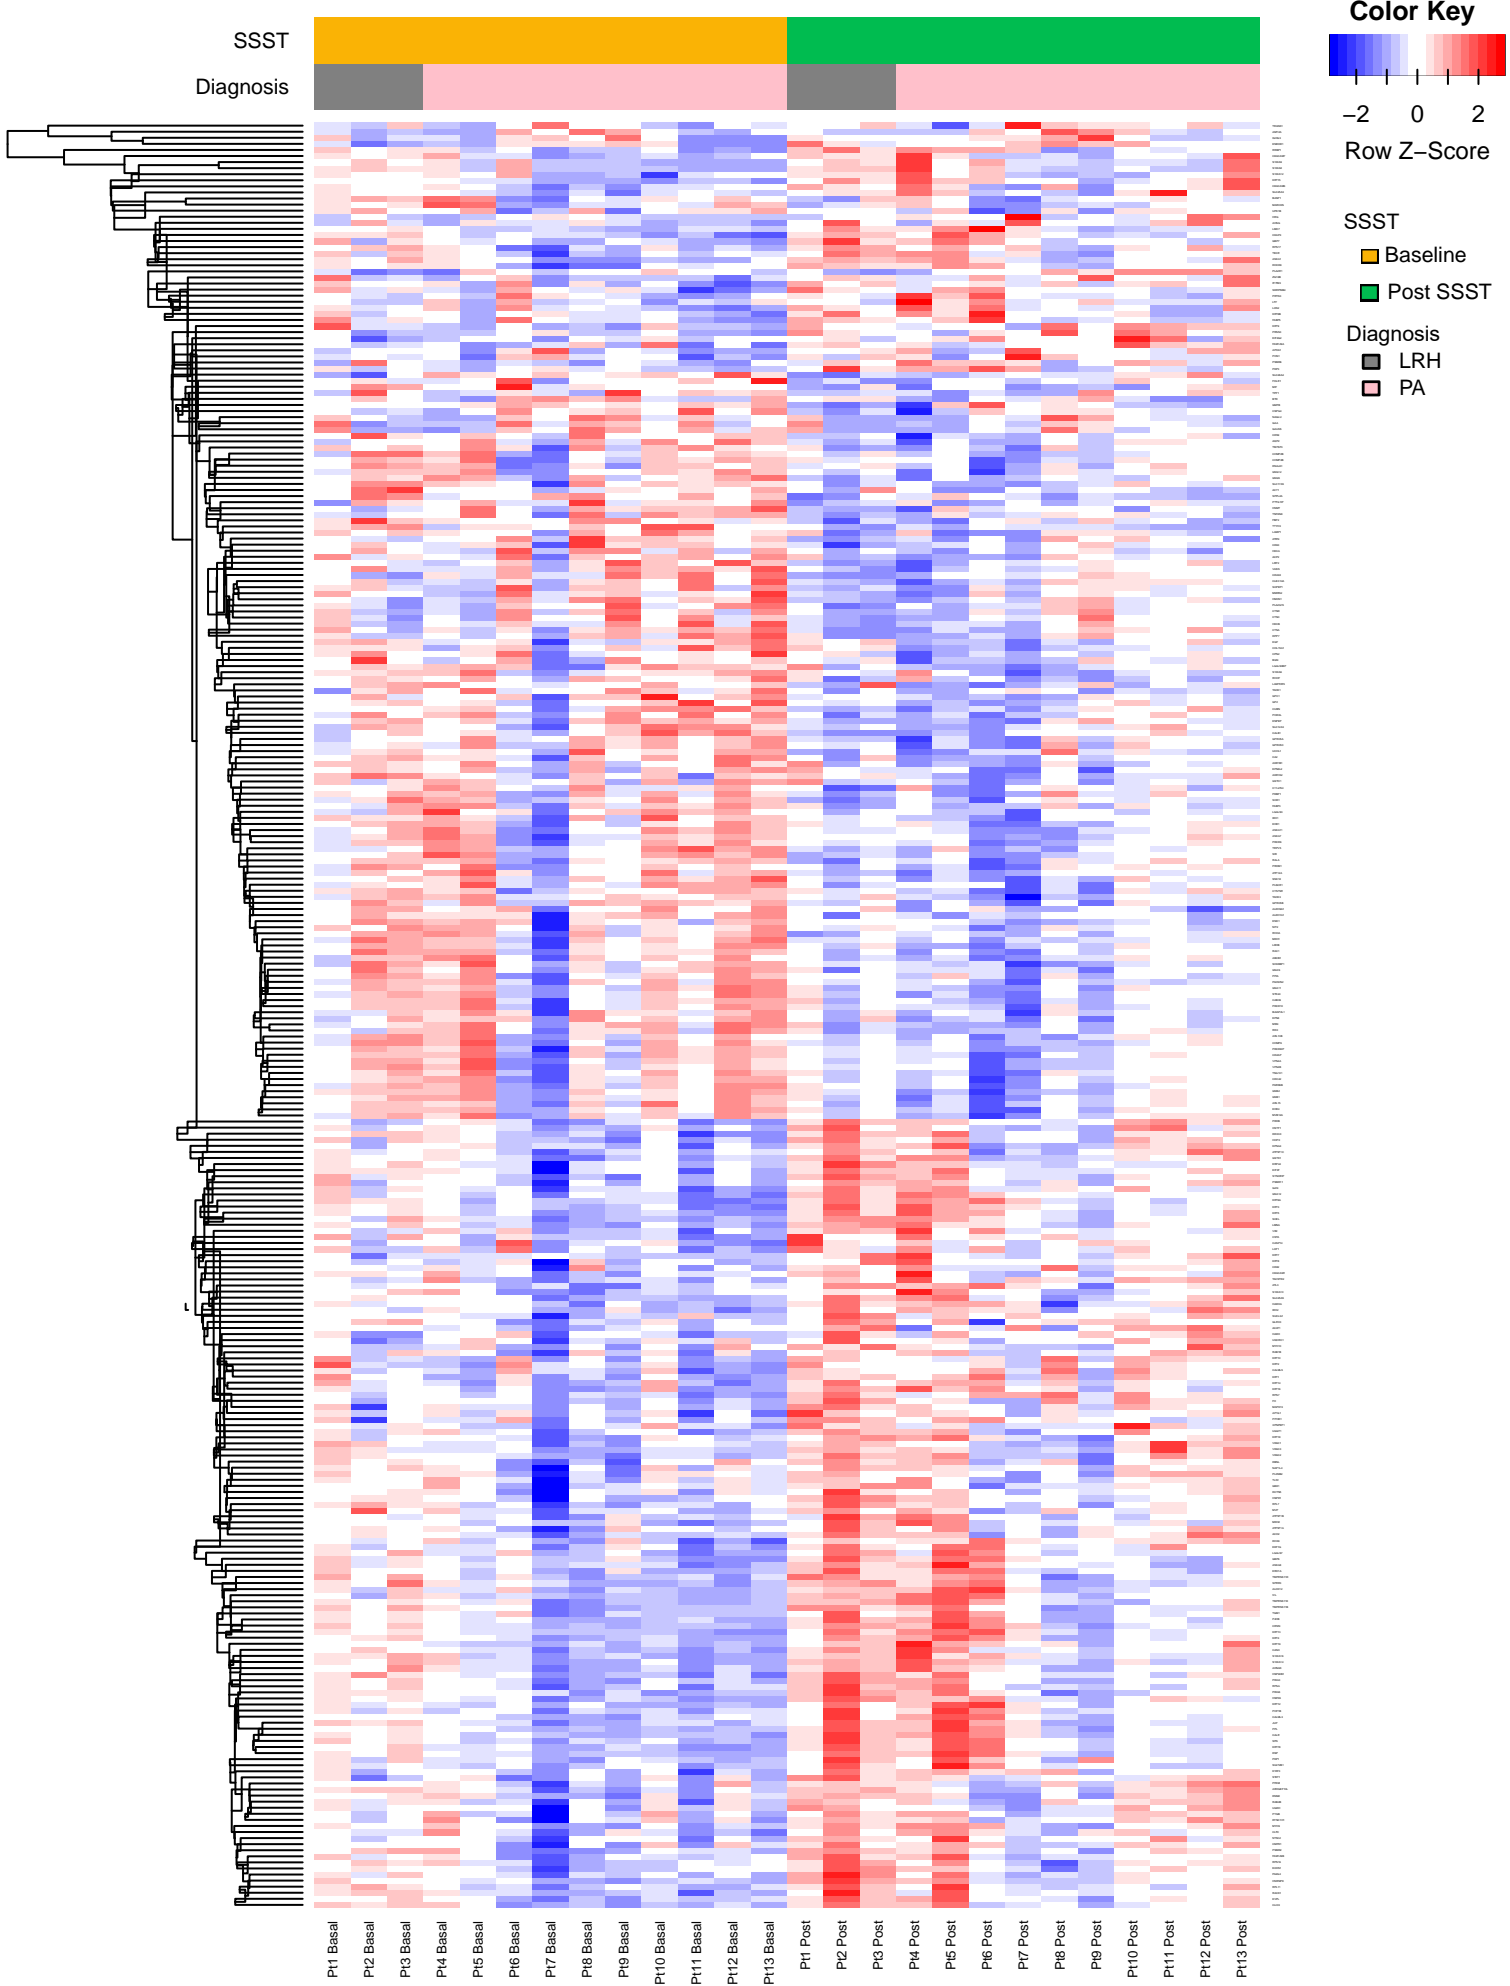

**Figure S3. Functional enrichment analyses of the 878 DEPs.**

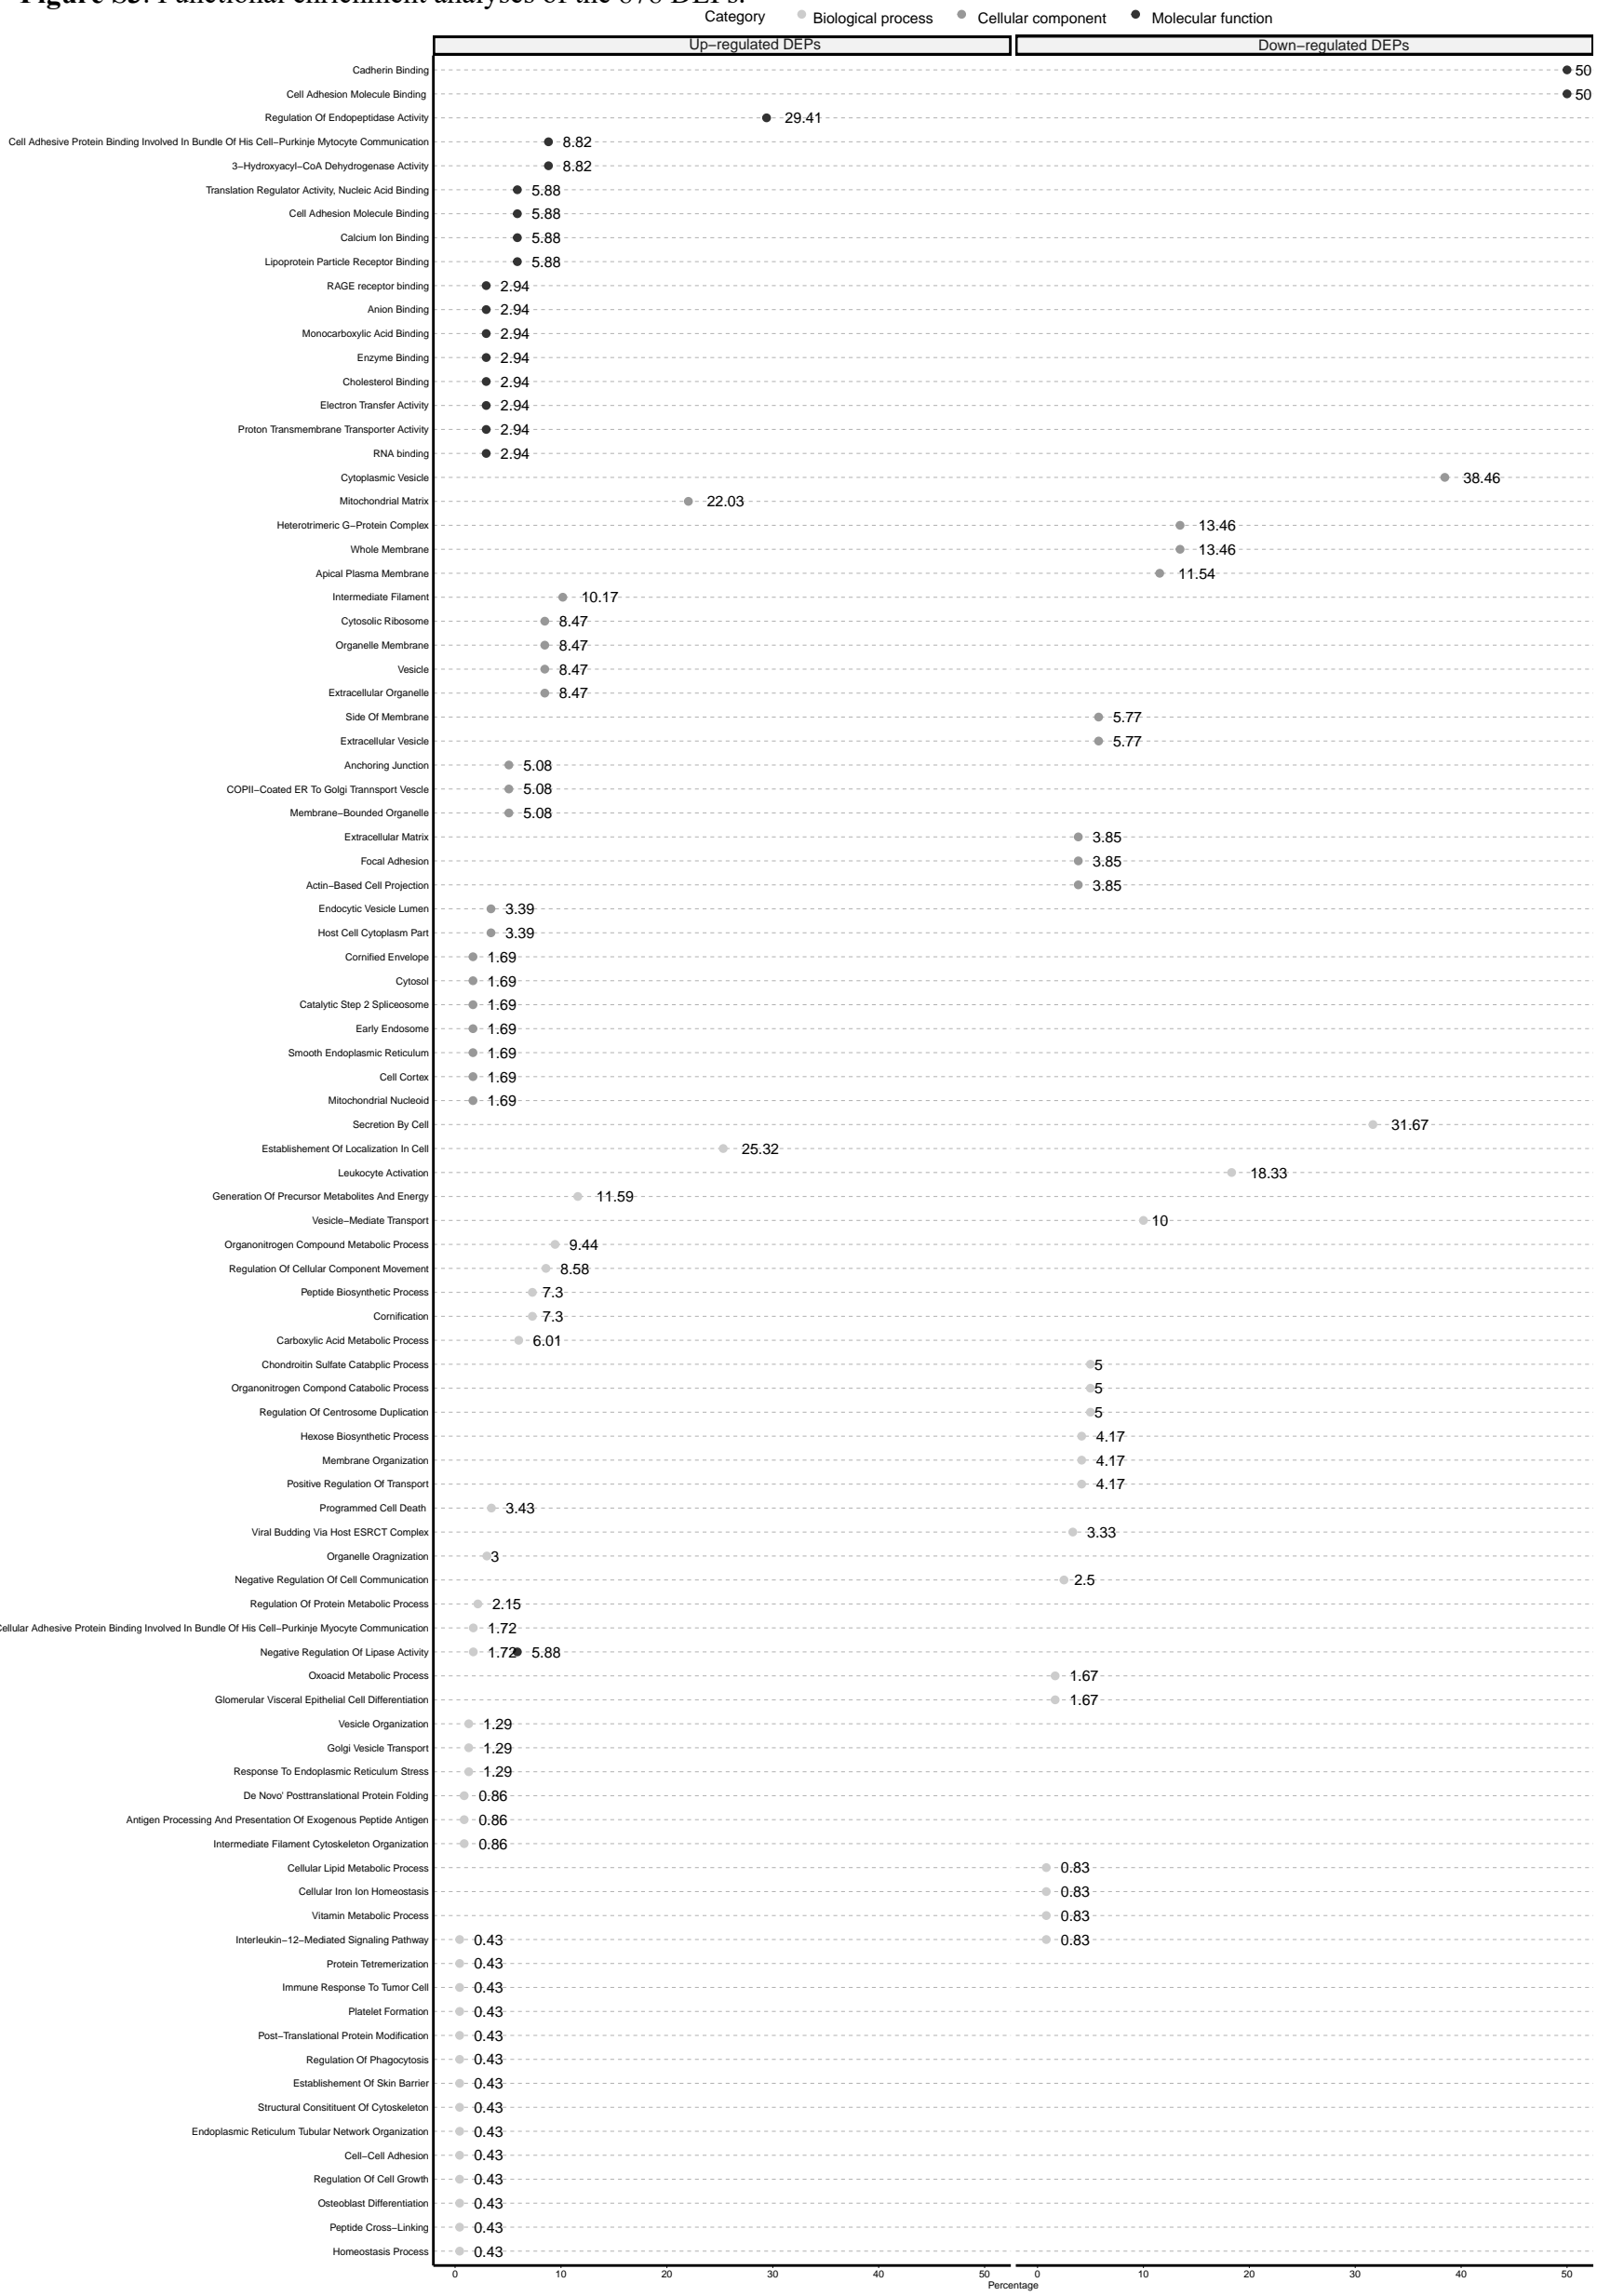

**Figure S4.** Correlations between biochemical parameters and the 12 differentially expressed renal transmembrane proteins.

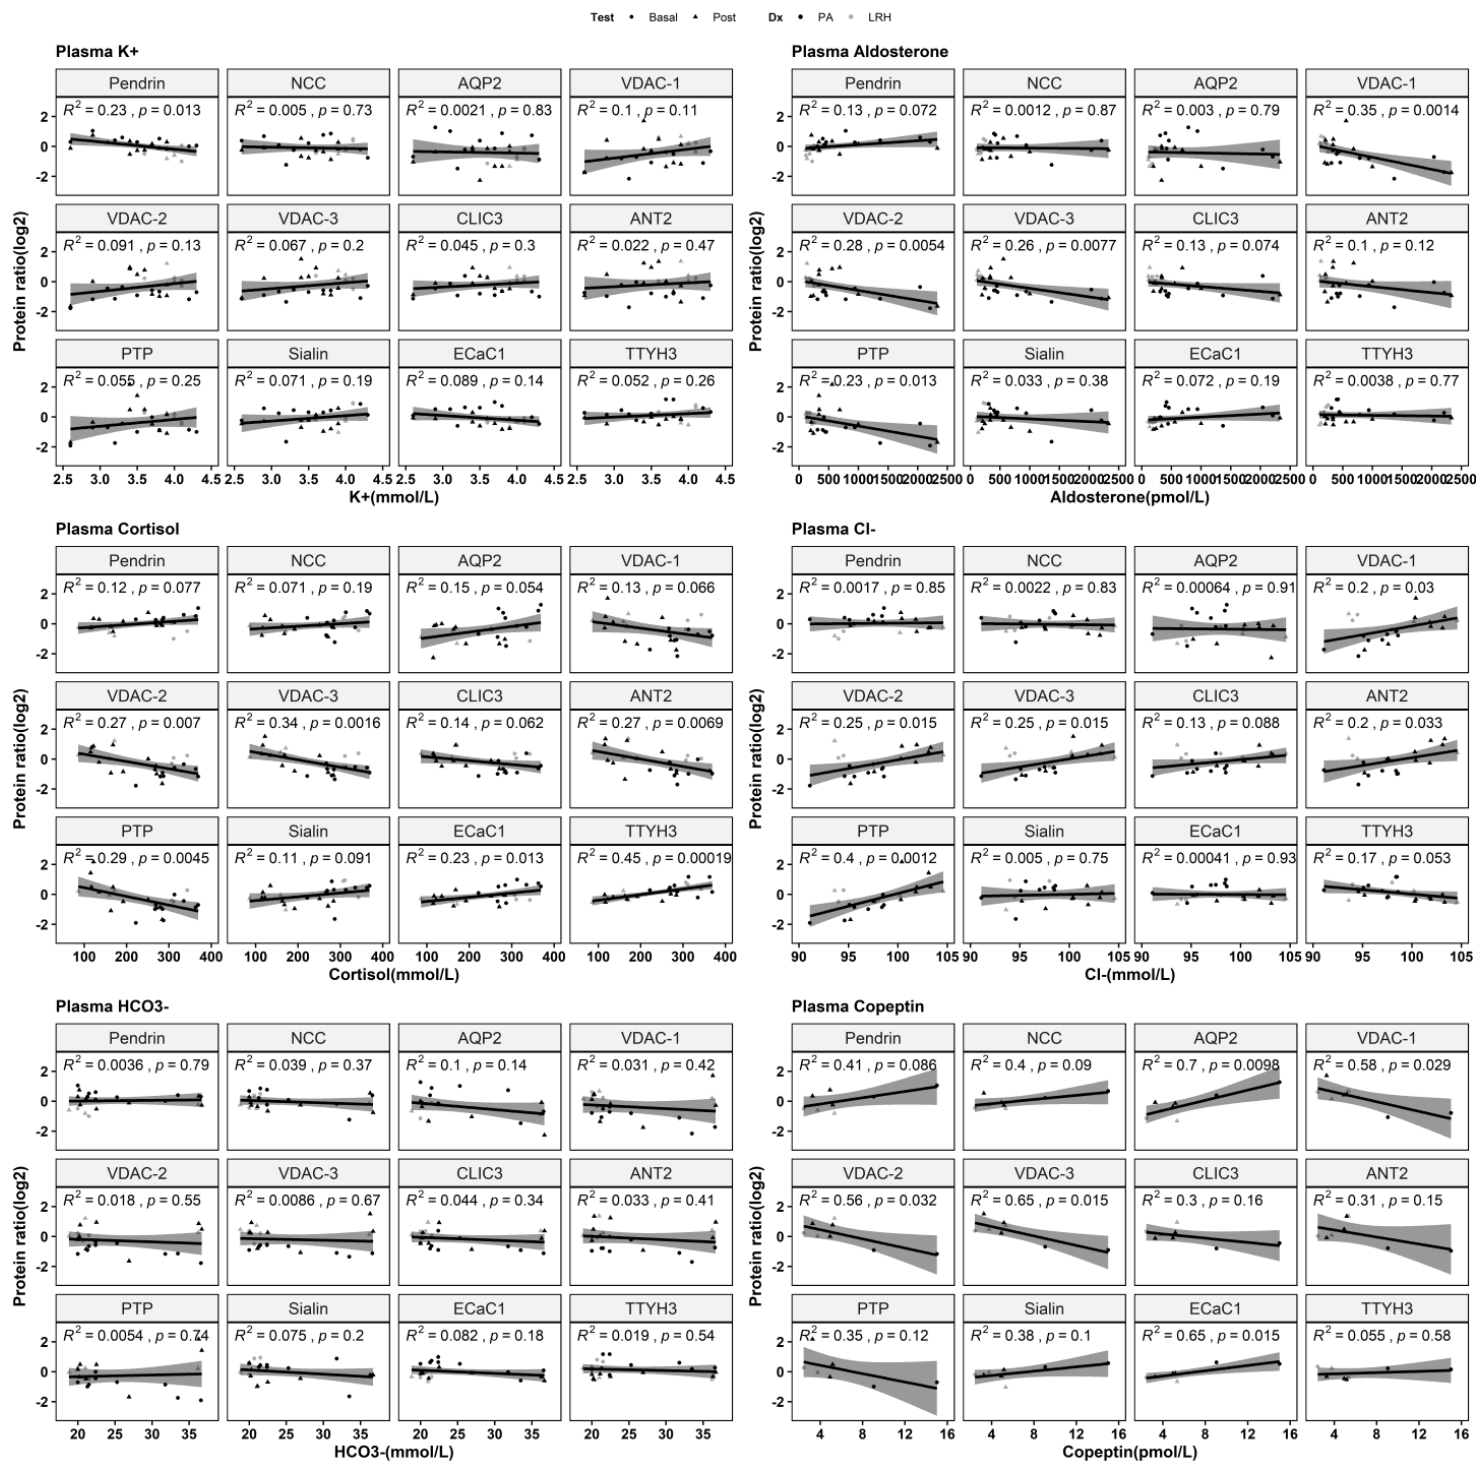

Figure S5. Immunoblots of analysed proteins.

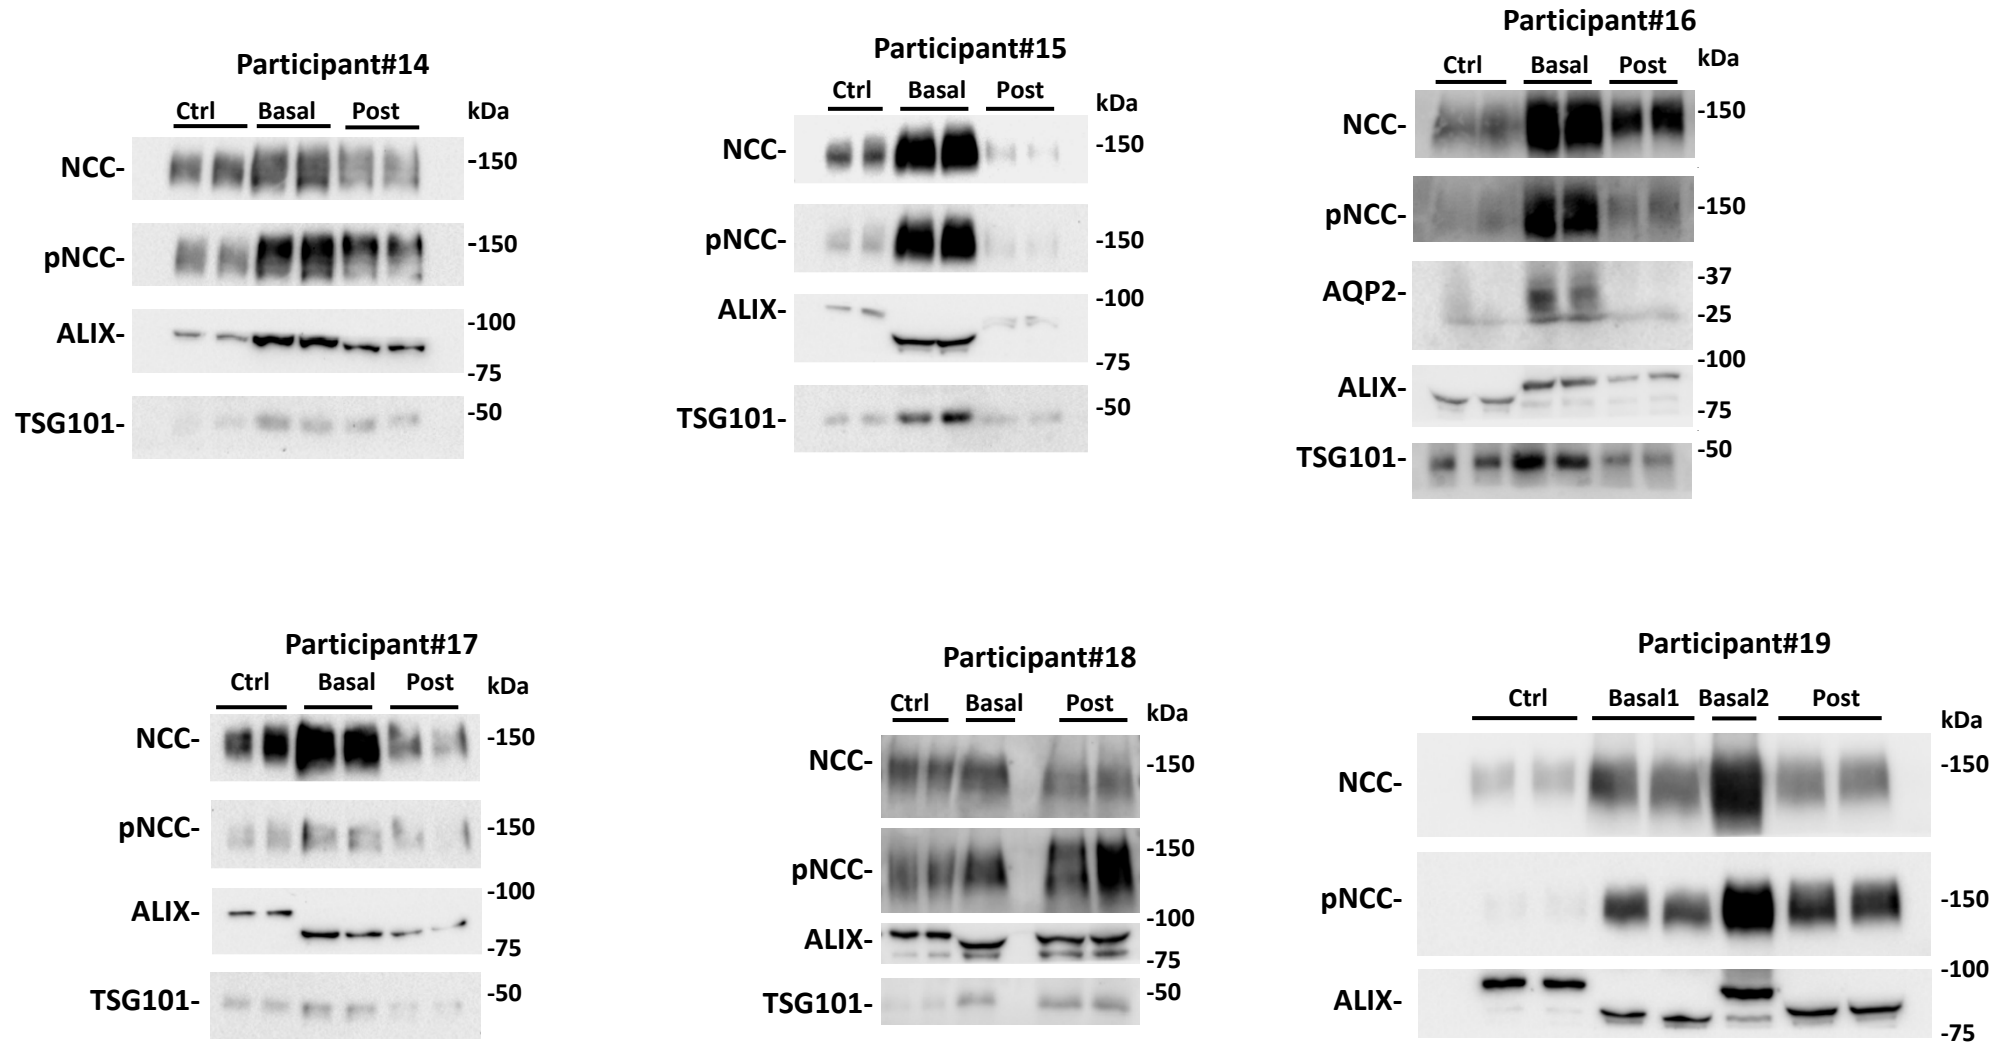

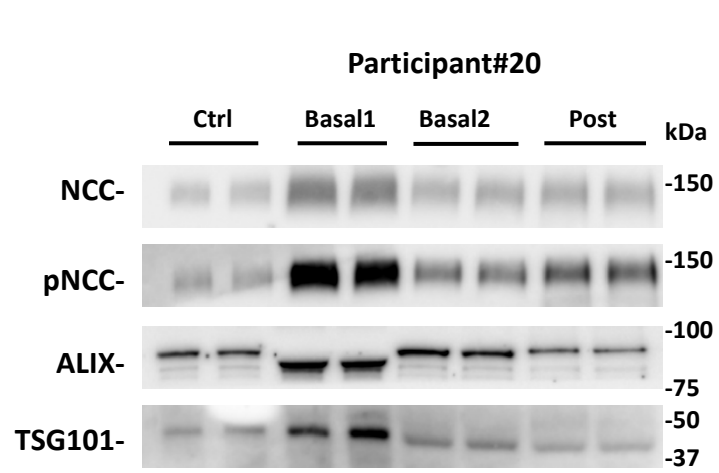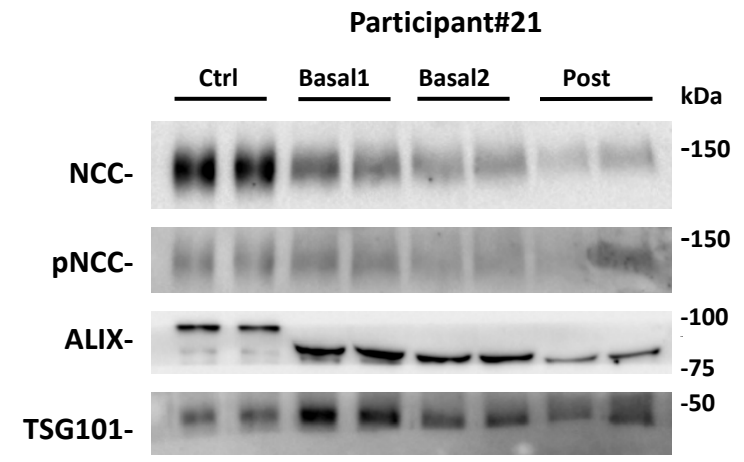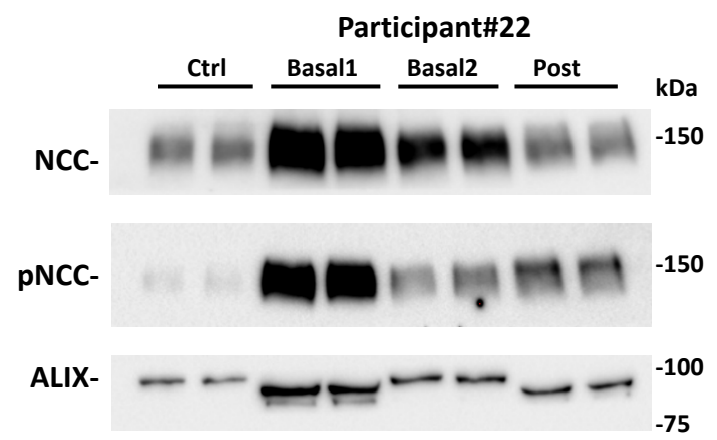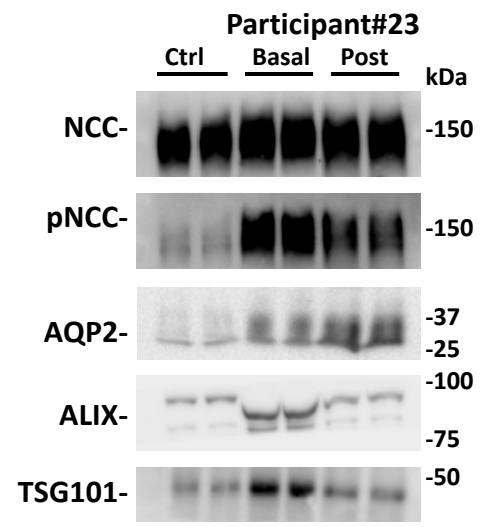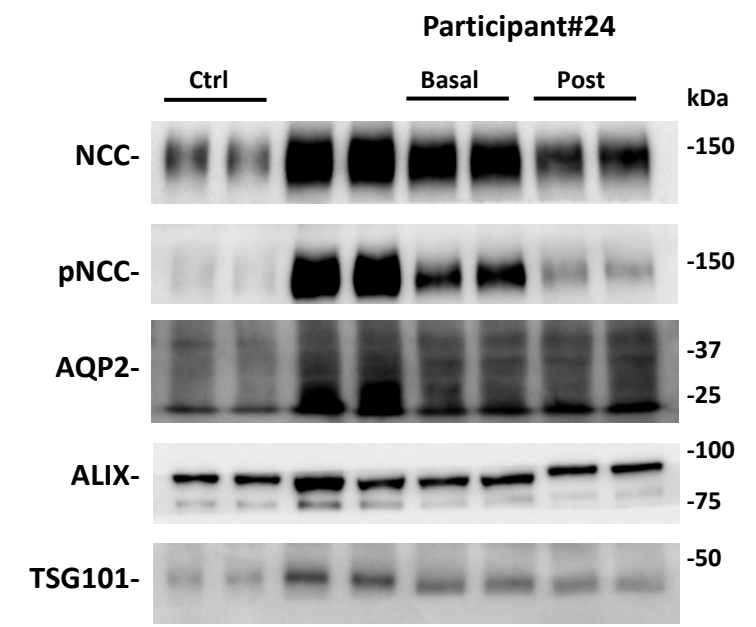

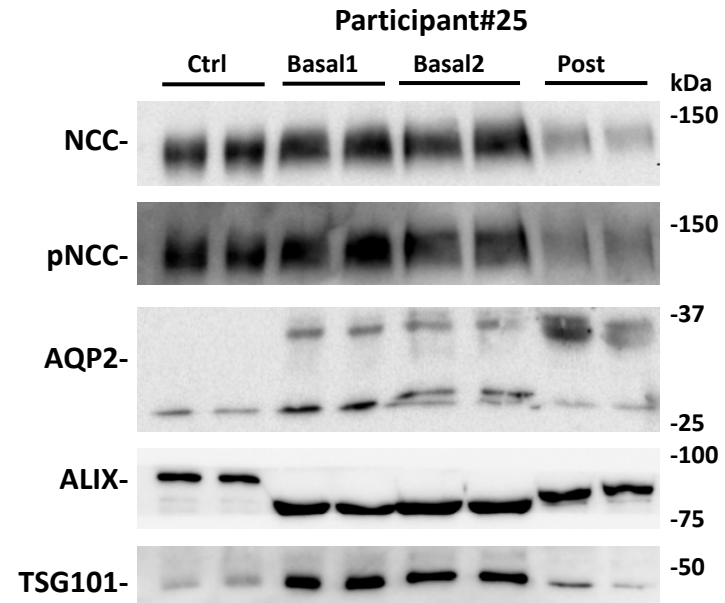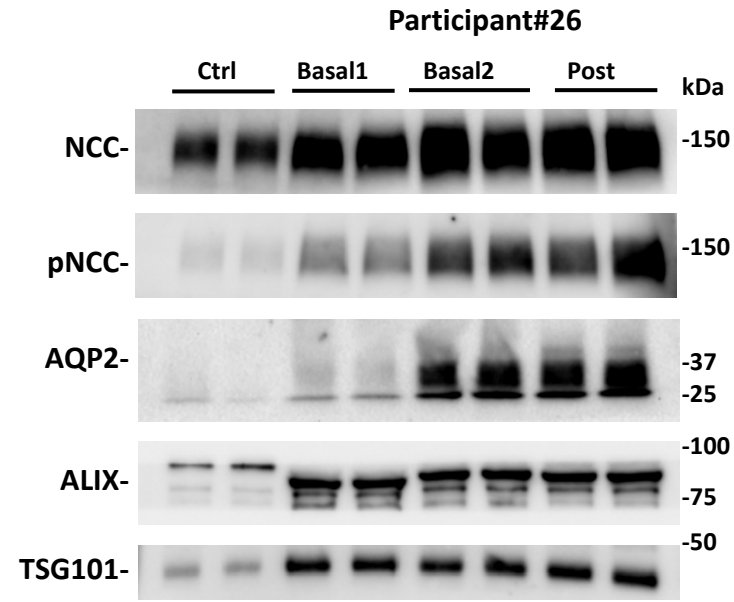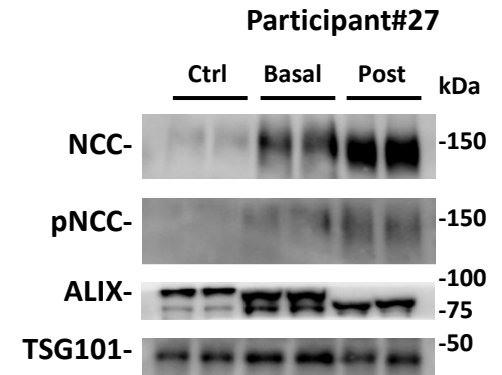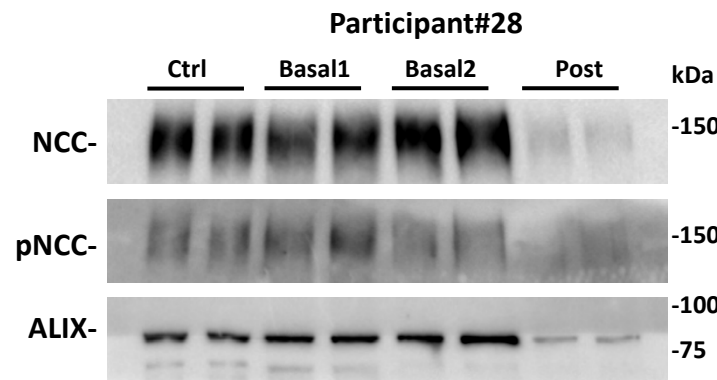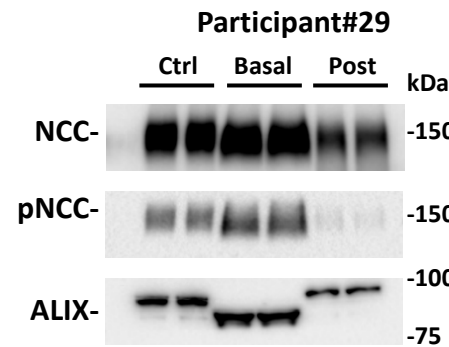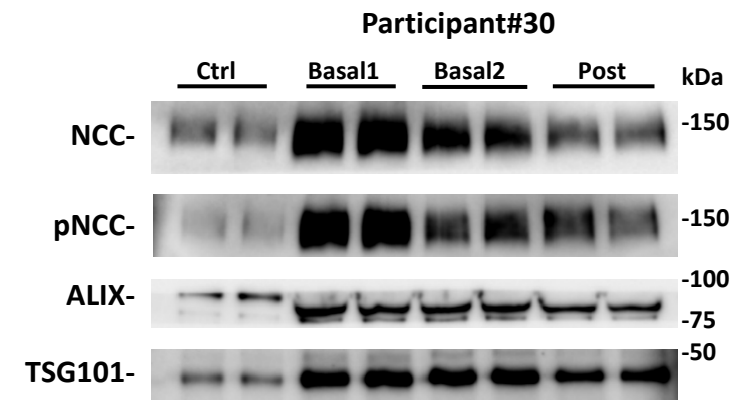



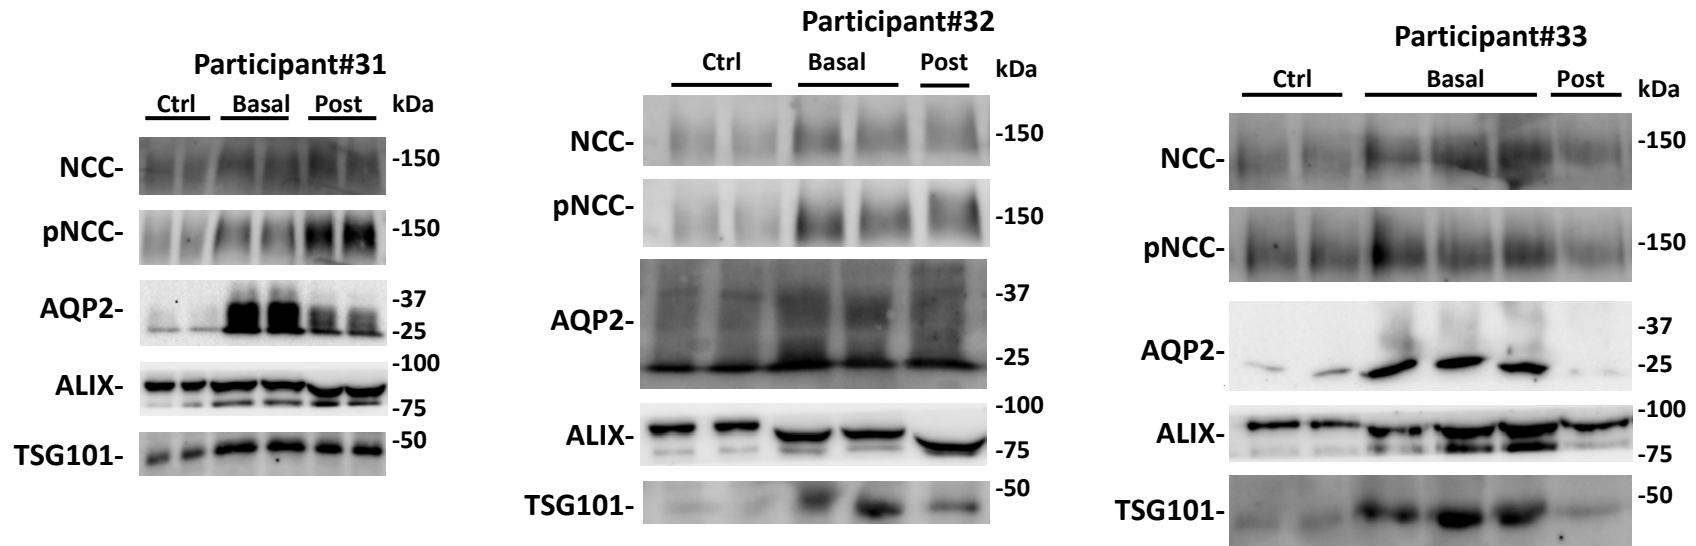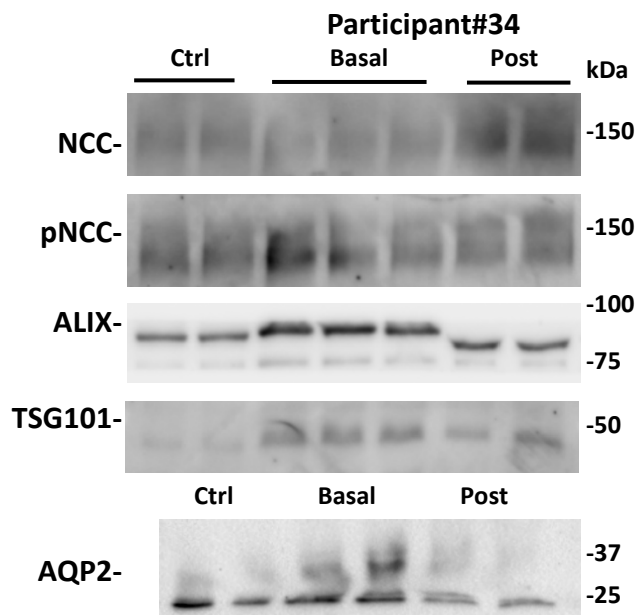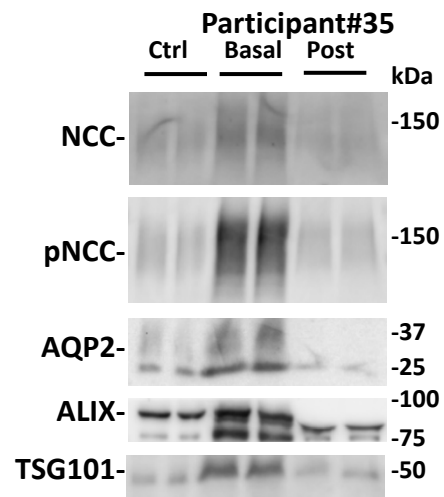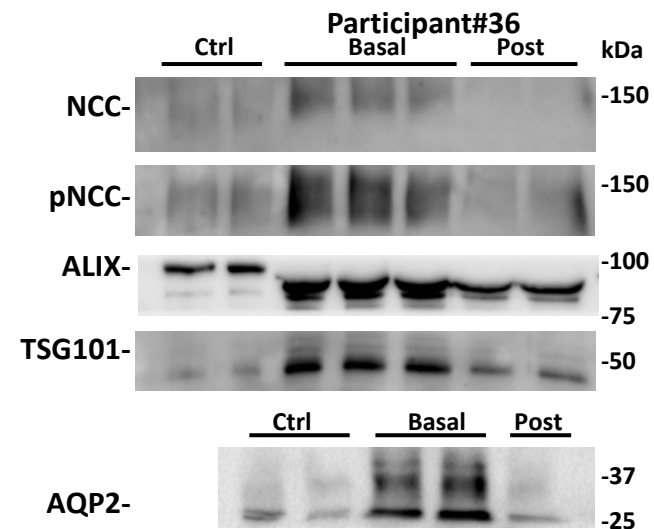

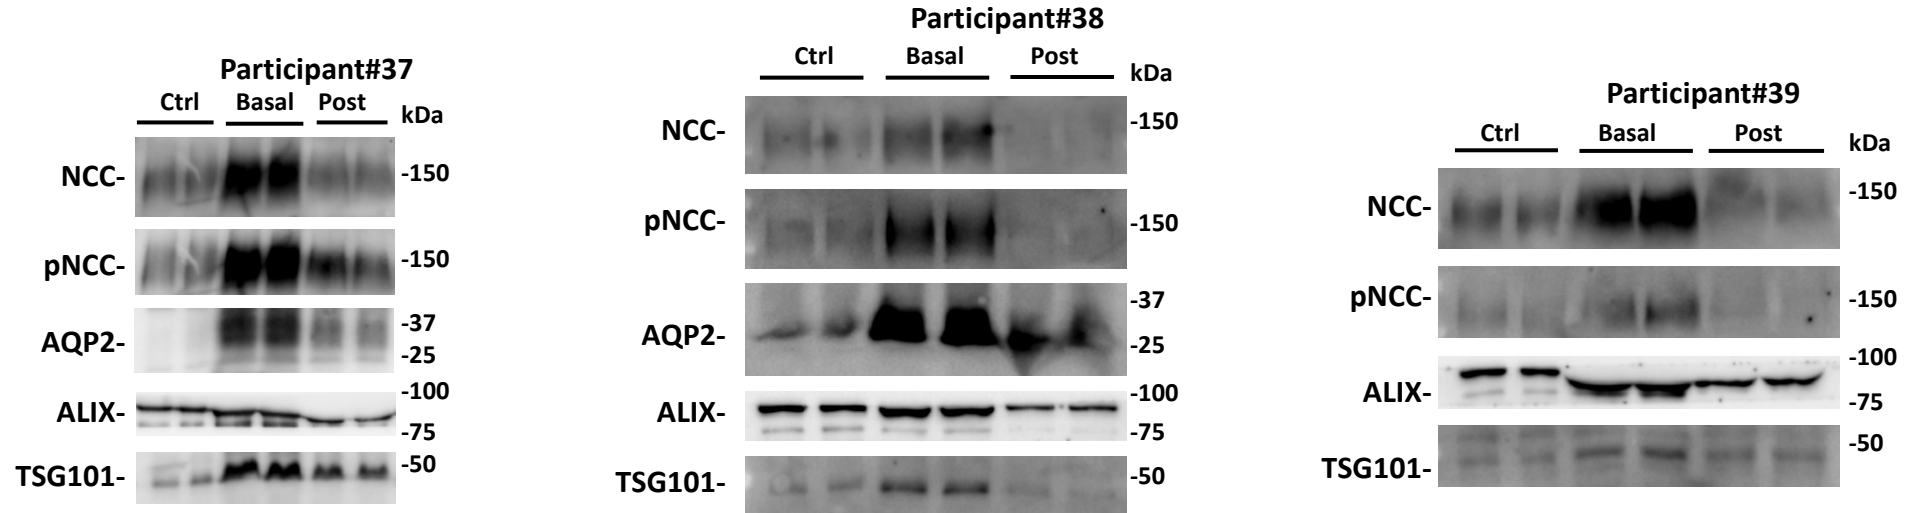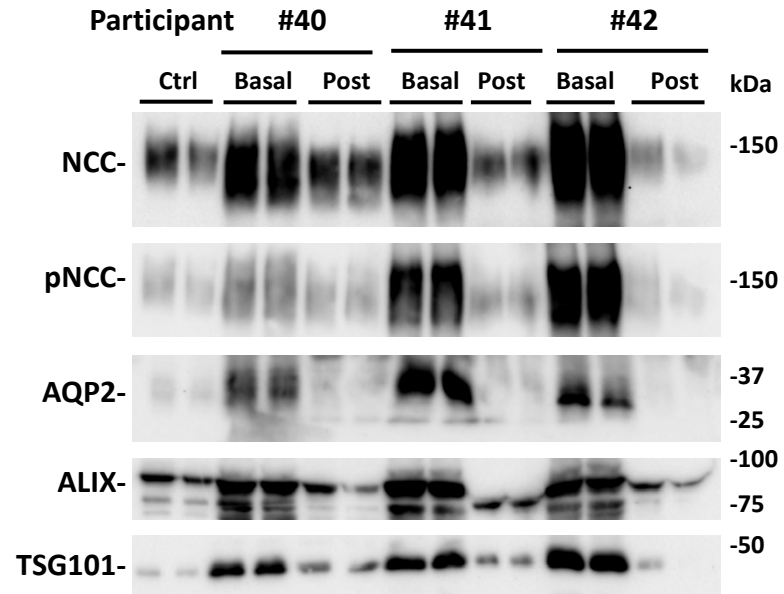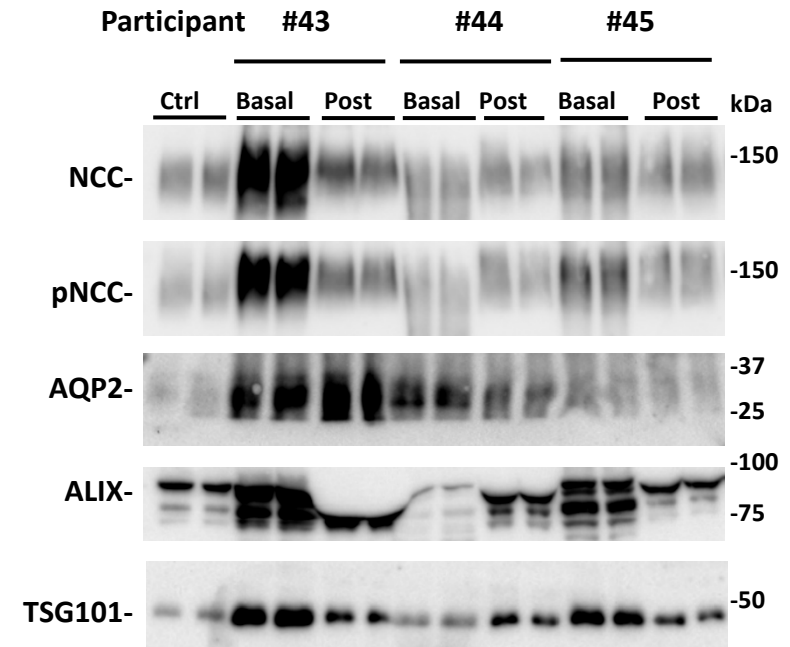

**Figure S6.** Correlations between biochemical parameters and NCC, pNCC and AQP2.

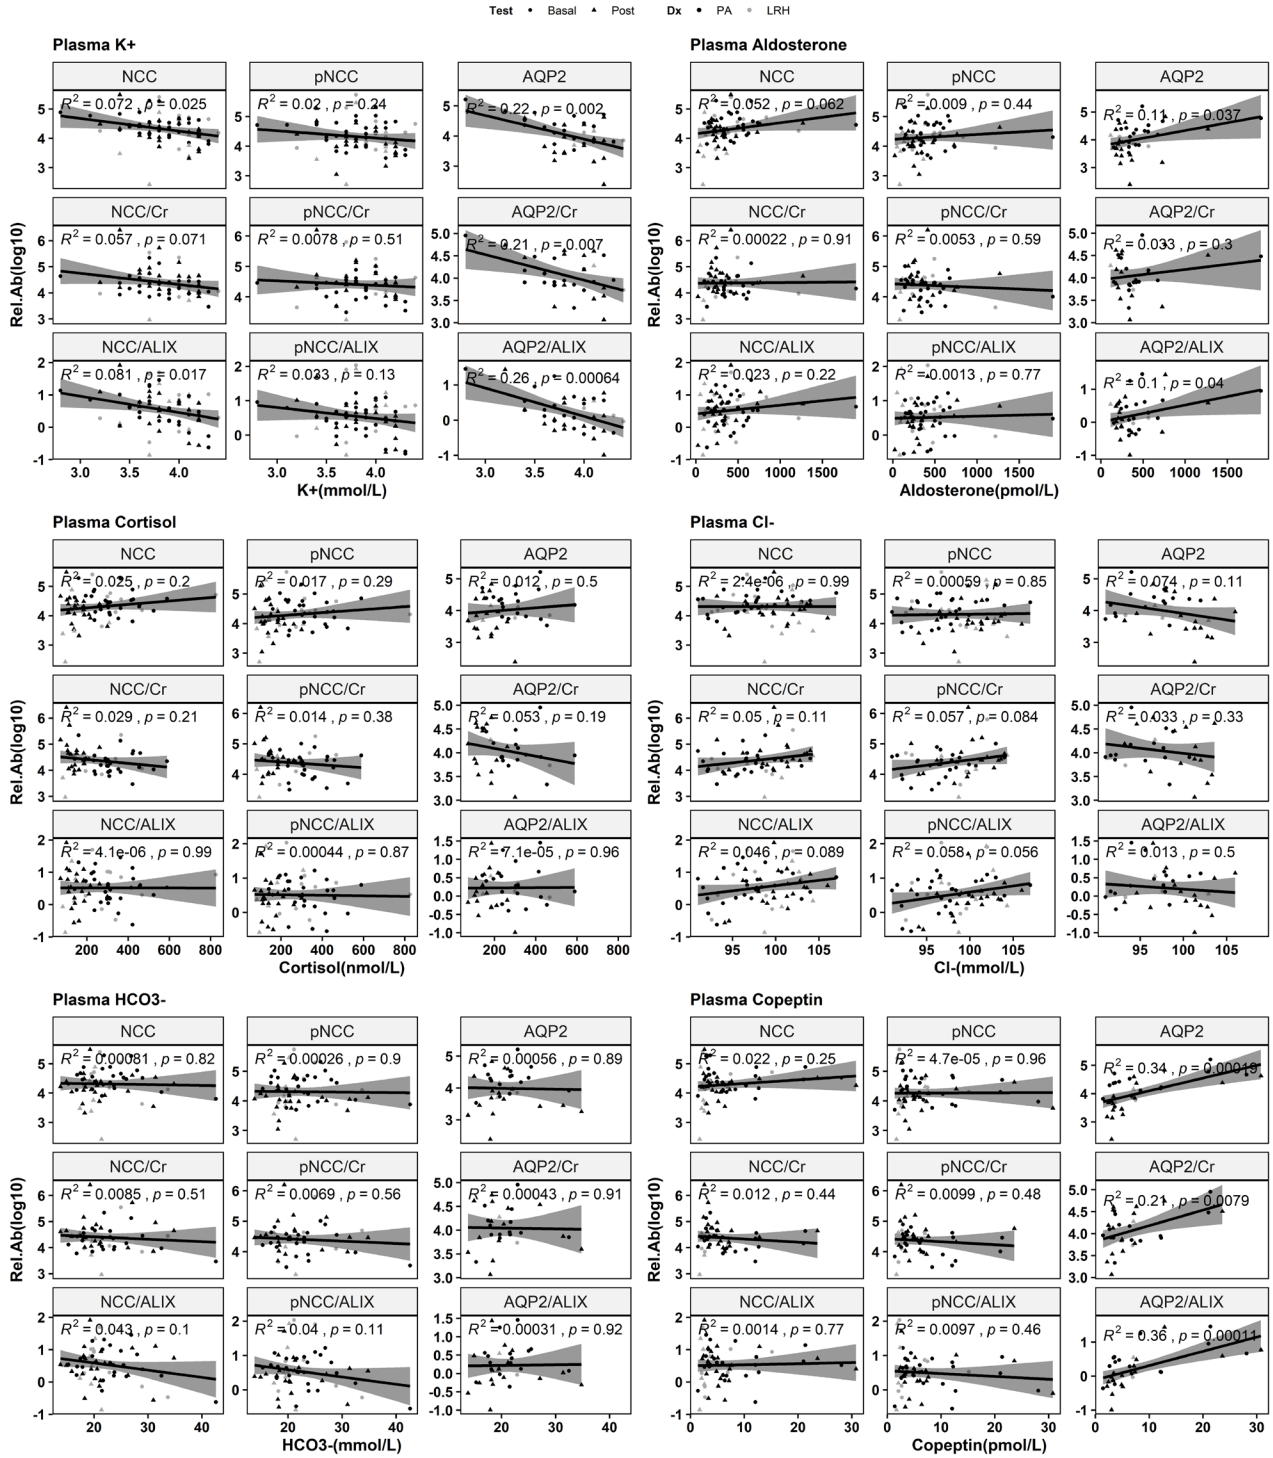

**Figure S7.** Boxplots of changes in the total contents in the urine during SSST. PA, primary aldosteronism; LRH, low renin essential hypertension; Rel. Ab\*Vol, protein relative abundance multiplying total urine volume.

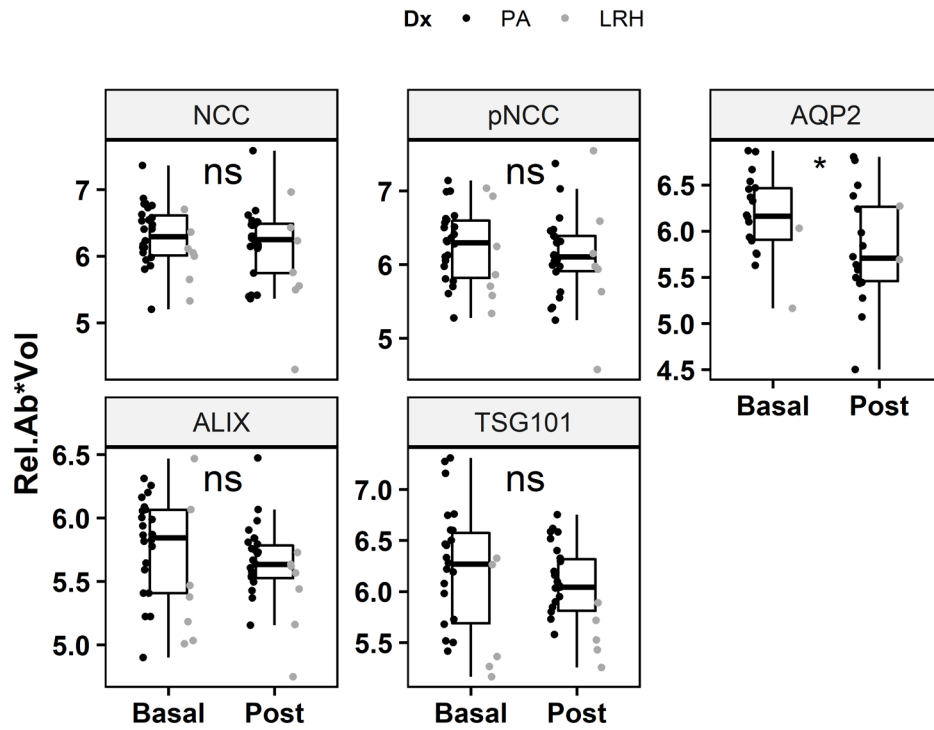

**Figure S8.** Correlations between EV markers (quantified by immunoblotting [WB] and mass spectrometry [MS]) and spot urine creatinine.

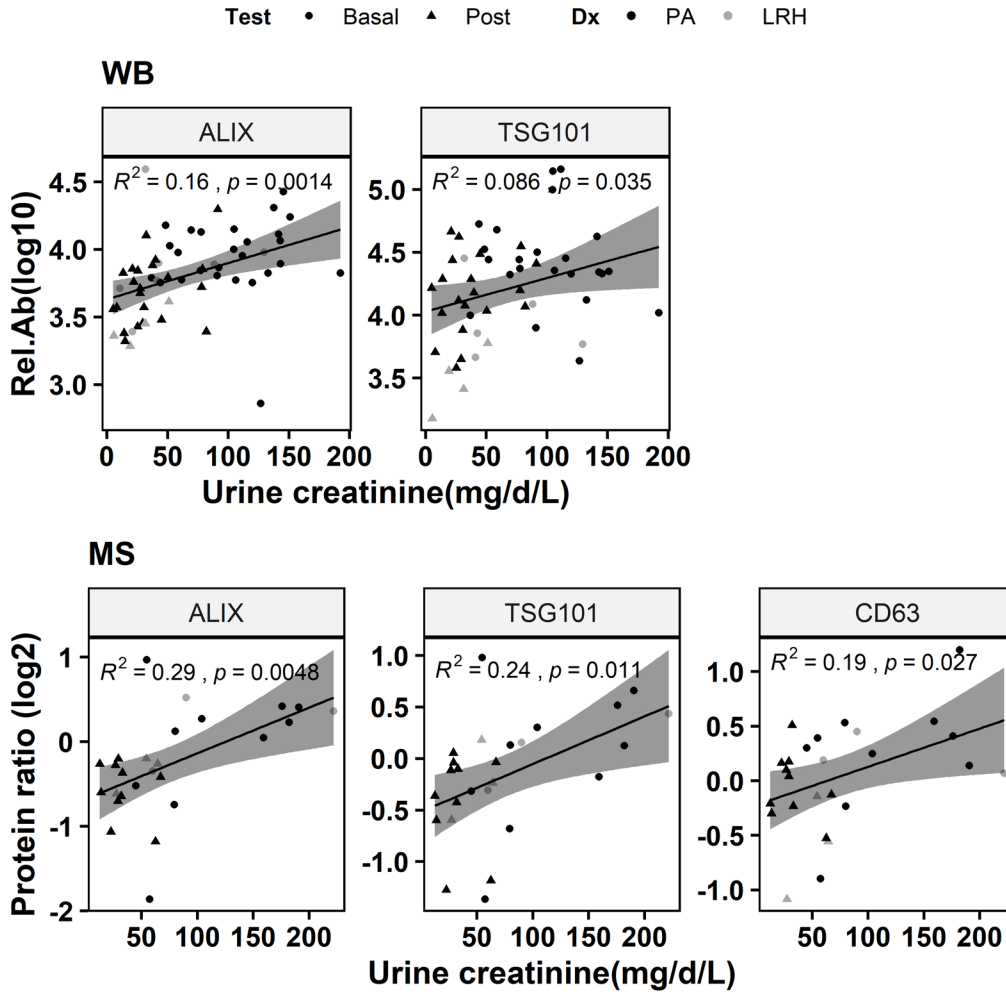

**Table S1.** Participants' clinical features and anti-hypertensive drugs at baseline.

| Patient No.         | Sex | Age at SSST | BMI (kg/m <sup>2</sup> ) | Dx  | SBP/DBP (mmHg/mmHg) | ADX | eGFR (ml/min) | Plasma creatinine (μmol/L) | Baseline plasma [K <sup>+</sup> ] (mmol/L) | Baseline plasma ARR (pmol/mU) | Anti-HTN drugs without affecting RAS (daily) |            |           |           |            |
|---------------------|-----|-------------|--------------------------|-----|---------------------|-----|---------------|----------------------------|--------------------------------------------|-------------------------------|----------------------------------------------|------------|-----------|-----------|------------|
|                     |     |             |                          |     |                     |     |               |                            |                                            |                               | No. of drugs                                 | Moxo (mcg) | Praz (mg) | Vera (mg) | Hydra (mg) |
| <i>Normal range</i> |     |             | 18.5 - 24.9              |     | <140/90 in adults   |     | >60           | 45/90                      | 3.5-5.5                                    | 2-75                          |                                              |            |           |           |            |
| <b>1</b>            | F   | 41.6        | 42.2                     | LRH | 143/93              | Non | >90           | 56                         | 3.6                                        | 69                            | 1                                            | -          | -         | 90        | -          |
| <b>2</b>            | F   | 54.9        | 29.7                     | LRH | 160/110             | Non | >90           | 57                         | 4.1                                        | 61                            | 1                                            | -          | -         | 120       | -          |
| <b>3</b>            | F   | 46.2        | 31.1                     | LRH | 118/82              | Non | >90           | 63                         | 4.1                                        | 78                            | 1                                            | -          | -         | 240       | -          |
| <b>4</b>            | F   | 59.2        | 29.9                     | PA  | 159/79              | Non | >90           | 49                         | 3.3                                        | 1810                          | 3                                            | 200        | -         | 240       | 50         |
| <b>5</b>            | F   | 56.9        | 23.5                     | PA  | 150/88              | Non | >90           | 61                         | 3.1                                        | 401                           | 0                                            | -          | -         | -         | -          |
| <b>6</b>            | F   | 45.0        | 47.0                     | PA  | 138/95              | Non | >90           | 52                         | 4.3                                        | 129                           | 1                                            | -          | -         | 90        | -          |
| <b>7</b>            | F   | 39.8        | 43.5                     | PA  | 145/115             | Non | >90           | 73                         | 3.2                                        | 178                           | 1                                            | -          | -         | 180       | -          |
| <b>8</b>            | M   | 50.5        | 28.7                     | PA  | 163/103             | Non | 83            | 92                         | 4.2                                        | 51                            | 2                                            | -          | 1         | 90        | -          |
| <b>9</b>            | M   | 58.3        | 51.4                     | PA  | 155/87              | Non | 81            | 90                         | 2.6                                        | 275                           | 2                                            | -          | -         | 240       | 50         |
| <b>10</b>           | M   | 37.5        | 30.1                     | PA  | 138/105             | Non | 82            | 101                        | 3.8                                        | 336                           | 2                                            | -          | -         | 240       | 25         |
| <b>11</b>           | M   | 42.2        | 26.2                     | PA  | 147/103             | Non | 83            | 97                         | 3.7                                        | 232                           | 3                                            | 200        | -         | 120       | 50         |
| <b>12</b>           | M   | 31.8        | 37.4                     | PA  | 180/111             | Non | >90           | 69                         | 2.9                                        | 211                           | 3                                            | -          | 1         | 120       | 50         |
| <b>13</b>           | F   | 65.2        | 28.5                     | PA  | 149/100             | Non | 74            | 74                         | 3.5                                        | 352                           | 2                                            | -          | -         | 120       | 12.5       |
| <b>14</b>           | M   | 48.9        | 28.2                     | PA  | 118/70              | Non | >90           | 78                         | 4.3                                        | 65                            | 1                                            | -          | -         | 240       | -          |
| <b>15</b>           | F   | 69.9        | 27.9                     | LRH | 146/69              | Non | 90            | 60                         | 3.7                                        | 276                           | 1                                            | -          | 1         | -         | -          |
| <b>16</b>           | M   | 50.7        | 32.1                     | PA  | 160/89              | Non | >90           | 76                         | 3.4                                        | 121                           | 3                                            | -          | 10        | 240       | 100        |
| <b>17</b>           | F   | 39.3        | 27.7                     | LRH | 158/72              | Non | >90           | 43                         | 3.2                                        | 54                            | 2                                            | 600        | -         | 240       | -          |
| <b>18</b>           | M   | 50.7        | 31.5                     | PA  | 138/68              | Non | 75            | 100                        | 3.6                                        | 166                           | 1                                            | -          | -         | 90        | -          |
| <b>19</b>           | F   | 36.0        | 30.2                     | LRH | 154/100             | Non | >90           | 53                         | 3.8                                        | 47                            | 0                                            | -          | -         | -         | -          |
| <b>20</b>           | F   | 57.2        | 26.9                     | PA  | 140/102             | Non | >90           | 62                         | 3.5                                        | 109                           | 1                                            | -          | -         | 120       | -          |
| <b>21</b>           | F   | 67.8        | 29.6                     | LRH | 163/85              | Non | >90           | 45                         | 4.0                                        | 212                           | 2                                            | -          | -         | 120       | 50         |
| <b>22</b>           | F   | 51.4        | 24.9                     | PA  | 125/68              | Non | >90           | 59                         | 3.9                                        | 95                            | 2                                            | -          | -         | 240       | 50         |

|    |   |      |      |     |         |     |     |     |     |     |   |     |     |     |      |
|----|---|------|------|-----|---------|-----|-----|-----|-----|-----|---|-----|-----|-----|------|
| 23 | F | 51.6 | 33.4 | LRH | 149/83  | Non | >90 | 56  | 4.4 | 41  | 2 | -   | -   | 240 | 100  |
| 24 | F | 35.7 | 32.8 | LRH | 132/80  | Non | >90 | 59  | 4.3 | 32  | 1 | -   | -   | 180 | -    |
| 25 | F | 62.5 | 30.0 | PA  | 110/65  | Non | 90  | 64  | 4.3 | 128 | 1 | -   | -   | 180 | -    |
| 26 | M | 38.6 | 39.3 | PA  | 144/100 | Non | >90 | 69  | 3.4 | 335 | 2 | 200 | -   | 120 | -    |
| 27 | F | 57.5 | 24.1 | PA  | 140/80  | Non | >90 | 62  | 3.8 | 301 | 0 | -   | -   | -   | -    |
| 28 | F | 42.8 | 23.1 | LRH | 125/70  | Non | 84  | 76  | 4.1 | 411 | 1 | -   | -   | 180 | -    |
| 29 | F | 69.5 | 31.8 | PA  | 170/88  | Non | >90 | 52  | 3.9 | 144 | 2 | 400 | -   | 240 | -    |
| 30 | M | 44.0 | 28.5 | PA  | 156/106 | Non | >90 | 73  | 3.8 | 134 | 2 | -   | -   | 240 | 37.5 |
| 31 | M | 64.5 | 35.8 | PA  | 138/74  | Non | >90 | 78  | 3.5 | 609 | 4 | 400 | 4.5 | 480 | 150  |
| 32 | F | 64.7 | 28.0 | PA  | 168/80  | Non | >90 | 55  | 3.7 | 49  | 2 | -   | -   | 240 | 50   |
| 33 | M | 65.4 | 31.6 | PA  | 166/102 | Non | >90 | 73  | 3.9 | 130 | 3 | -   | 1.0 | 240 | 75   |
| 34 | F | 55.3 | 31.3 | PA  | 163/101 | Non | >90 | 46  | 3.9 | 88  | 0 | -   | -   | -   | -    |
| 35 | F | 52.9 | 29.4 | PA  | 122/80  | Non | >90 | 52  | 3.8 | 243 | 1 | -   | -   | 360 | -    |
| 36 | M | 68.1 | 34.0 | PA  | 142/92  | Non | 87  | 80  | 3.7 | 136 | 2 | -   | -   | 240 | 50   |
| 37 | M | 66.2 | 26.0 | PA  | 161/58  | Non | >90 | 68  | 2.8 | 143 | 3 | 200 | 4.0 | 240 | -    |
| 38 | F | 43.6 | 41.8 | PA  | 118/82  | Non | >90 | 57  | 4.1 | 51  | 1 | -   | -   | 240 | -    |
| 39 | F | 53.6 | 27.3 | PA  | 164/92  | Non | >90 | 61  | 3.6 | 281 | 2 | -   | -   | 180 | 25   |
| 40 | F | 45.1 | 38.1 | PA  | 164/71  | Non | >90 | 57  | 4.2 | 36  | 2 | 400 | -   | 360 | -    |
| 41 | F | 39.3 | 25.6 | PA  | 134/84  | Non | 84  | 77  | 4.0 | 98  | 0 | -   | -   | -   | -    |
| 42 | F | 51.7 | 25.6 | PA  | 100/60  | Non | >90 | 55  | 3.6 | 246 | 0 | -   | -   | -   | -    |
| 43 | M | 38.5 | 36.8 | PA  | 170/98  | Non | 75  | 108 | 3.7 | 48  | 4 | 600 | 4   | 360 | 75   |
| 44 | F | 70.4 | 39.0 | PA  | 154/69  | Non | 77  | 69  | 3.9 | 122 | 4 | 600 | 4   | 60  | 100  |

No., number; SSST, seated saline suppression testing; BMI, body mass index; Dx, diagnosis of primary aldosteronism; SBP, systolic blood pressure; DBP, diastolic blood pressure; ADX, unilateral adrenalectomy; eGFR, estimated glomerular filtration rate; plasma [K<sup>+</sup>], plasma potassium concentration; ARR, aldosterone-to-renin ratio; anti-HTN, anti-hypertensive; RAS, renin angiotensin ii system; Moxo, Moxonidine; Praz, Prazosine; Vera, Verapamil; Hydra, Hydralazine; F, female; M, male; PA, primary aldosteronism; LRH, low renin essential hypertension.

**Table S2.** NTA measures of particle size and concentration of nine uEV samples.

| Sample No. | Dilution | Particle Size (nm) |              | Participle concentration<br>(*10 <sup>9</sup> particle/mL) | Particles/frame |
|------------|----------|--------------------|--------------|------------------------------------------------------------|-----------------|
|            |          | Mean               | Mode         |                                                            |                 |
| 1          | 1:750    | 218.9 ± 1.6        | 142.8 ± 7.2  | 1.55 ± 0.074                                               | 78.6 ± 3.7      |
| 2          | 1:750    | 266.0 ± 3.1        | 171.4 ± 13.9 | 1.65 ± 0.022                                               | 83.7 ± 1.1      |
| 3          | 1:500    | 222.8 ± 11.4       | 139.9 ± 7.0  | 0.99 ± 0.11                                                | 50.2 ± 5.6      |
| 4          | 1:500    | 230.6 ± 5.5        | 146.1 ± 2.5  | 1.38 ± 0.028                                               | 70.3 ± 1.4      |
| 5          | 1:250    | 227.9 ± 6.0        | 143.8 ± 4.8  | 1.29 ± 0.026                                               | 65.5 ± 1.3      |
| 6          | 1:250    | 341.3 ± 5.7        | 178.5 ± 3.6  | 1.37 ± 0.040                                               | 69.4 ± 2.0      |
| 7          | 1:750    | 341.7 ± 5.9        | 194.9 ± 6.7  | 1.37 ± 0.089                                               | 69.4 ± 4.5      |
| 8          | 1:750    | 306.9 ± 8.6        | 179.6 ± 8.1  | 1.76 ± 0.063                                               | 89.2 ± 3.2      |
| 9          | 1:150    | 271.9 ± 4.1        | 163.3 ± 11.5 | 1.93 ± 0.053                                               | 98.2 ± 2.7      |



**Table S3.** Abbreviation list.

| <b>Abbreviations</b>          | <b>Description</b>                                     |
|-------------------------------|--------------------------------------------------------|
| ALIX                          | Apoptosis-Linked Gene 2-Interacting Protein X          |
| AQP2                          | Aquaporin 2                                            |
| ARR                           | Aldosterone-to-Renin Ratio                             |
| CD9                           | Tetraspanin CD9                                        |
| Cl <sup>-</sup>               | Chloride                                               |
| DEP                           | Differentially Expressed Protein                       |
| ESCRT                         | The Endosomal Sorting Complexes Required for Transport |
| EV                            | Extracellular Vesicles                                 |
| FC                            | Fold Change                                            |
| FDR                           | False Discovery Rate                                   |
| GO                            | Gene Ontology                                          |
| HCO <sub>3</sub> <sup>-</sup> | Bicarbonate                                            |
| K <sup>+</sup>                | Potassium                                              |
| KCl                           | Potassium Chloride                                     |
| LC-MS/MS                      | Liquid Chromatography with Tandem Mass Spectrometry    |
| LRH                           | Low Renin Essential Hypertension                       |
| Na <sup>+</sup>               | Sodium                                                 |
| NaCl                          | Sodium Chloride                                        |
| NCC                           | Sodium Chloride Cotransporter                          |
| NTA                           | Nanoparticle Tracking Analysis                         |
| PA                            | Primary Aldosteronism                                  |
| pNCC                          | Phosphorylated NCC                                     |
| RAAS                          | Renin Angiotensin Aldosterone System                   |
| SSST                          | Seated Saline Suppression Testing                      |
| TMT                           | Tandem Mass Tag                                        |
| TSG101                        | Tumour Susceptibility Gene 101                         |
| uEVs                          | Urinary Extracellular Vesicles                         |
